# Supplementary material
Source: PubMed Central journal article supplement (PMC6946877)
Supplement: NIHMS1541069-supplement-3.pdf [file NIHMS1541069-supplement-3.pdf]

## Supplementary Figure 3

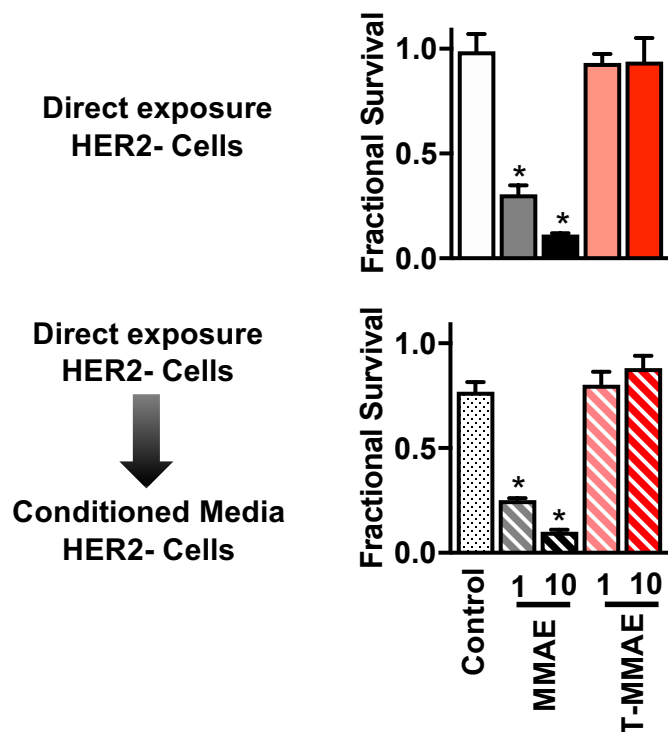

**Supplementary Figure 3: T-MMAE stability and bystander cytotoxicity in HER2 negative cells.** HCT116 cells were exposed to 1 or 10 nM MMAE or T-MMAE for 48 hrs. Treated cells and media were collected and centrifuged to generate conditioned media. Freshly plated HCT116 target cells were exposed to fresh drug (top graph) or conditioned media from previously drug treated cells (bottom graph) for 72 hrs. Cell viability measured by Alamar Blue assay, normalized to control untreated cells and plotted as mean fractional survival  $\pm$  SD. \*P<0.05.
