# Supplementary material
Source: PubMed Central journal article supplement (PMC6946877)
Supplement: NIHMS1541069-supplement-4.pdf [file NIHMS1541069-supplement-4.pdf]

## Supplementary Figure 4

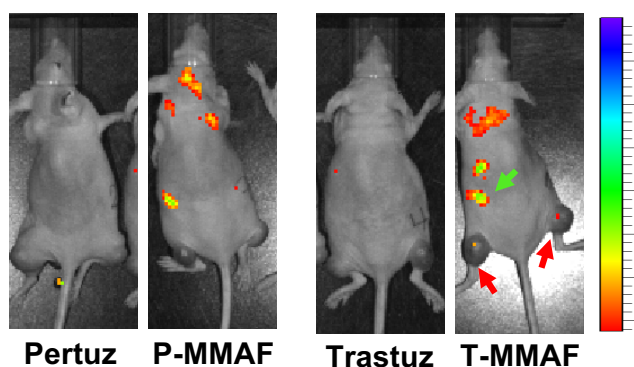

### Supplementary Figure 4: MMAF anti-HER2 antibody conjugates spatial localization in HER2 negative tumors.

HCT116 tumor xenografts grown in the bilateral thighs of mice (representative locations indicated by red arrows in right panel of T-MMAF injected mouse). 1 nmole of unlabeled antibody (pertuzumab or trastuzumab) or Cy5 labeled P-MMAF or T-MMAF i.v. injected and whole mouse imaging 24 hours later for Cy5 fluorescence. Green arrow points to gut auto-fluorescence (location indicated in right panel of T-MMAF injected mouse). Cy5 fluorescence scale bar on far right depicts dynamic range of epifluorescence efficiency of  $5 \times 10^{-5}$  to  $10 \times 10^{-5}$ .
