# Supplementary material
Source: PubMed Central journal article supplement (PMC6946877)
Supplement: NIHMS1541069-supplement-5.pdf [file NIHMS1541069-supplement-5.pdf]

## Supplementary Figure 5

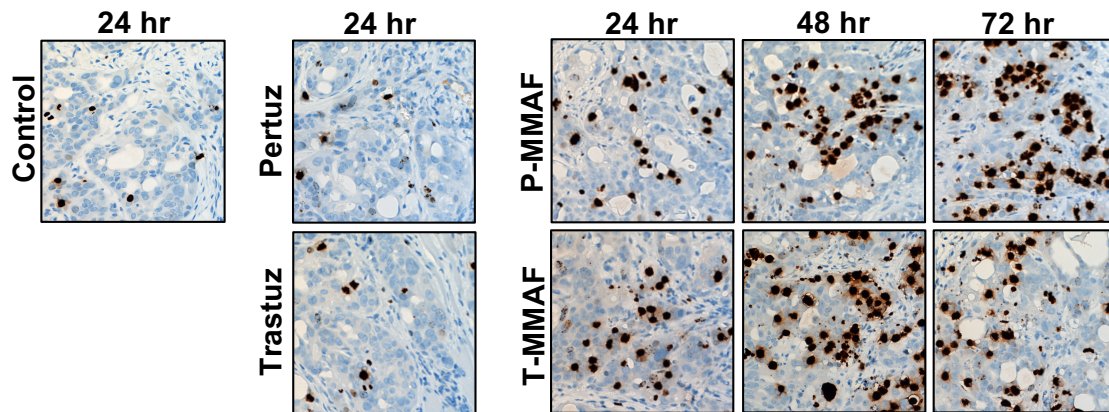

**Supplementary Figure 5: MMAF anti-HER2 antibody conjugates increase tumor G<sub>2</sub>/M fraction.** NCI N87 tumor bearing mice injected with 1 nmole of free antibodies or MMAF conjugates. Tumors harvested 24, 48 and 72 hours later and stained for G<sub>2</sub>/M marker pS10 histone H3.
