# Supplementary material
Source: PubMed Central journal article supplement (PMC6946877)
Supplement: NIHMS1541069-supplement-6.pdf [file NIHMS1541069-supplement-6.pdf]

## Supplementary Figure 6

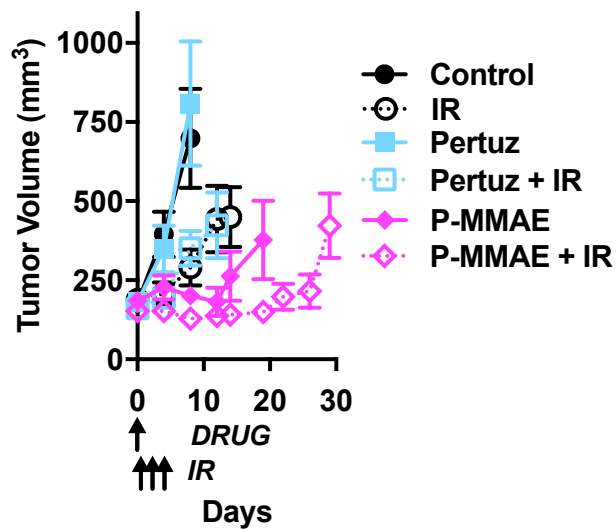

**Supplementary Figure 6: Pertuzumab conjugated MMAE and IR tumor control.** Mice bearing OE19 tumor xenografts were IV injected on day 0 with 0.5 nmole pertuzumab or P-MMAE. IR treated mice were focally given 2.5 Gy on days 1, 2 and 3. Tumors were measured twice a week and plotted as mean tumor volume  $\pm$  SEM.
