# Supplementary material
Source: PubMed Central journal article supplement (PMC6946877)
Supplement: NIHMS1541069-supplement-7.pdf [file NIHMS1541069-supplement-7.pdf]

Supplementary  
Figure 7

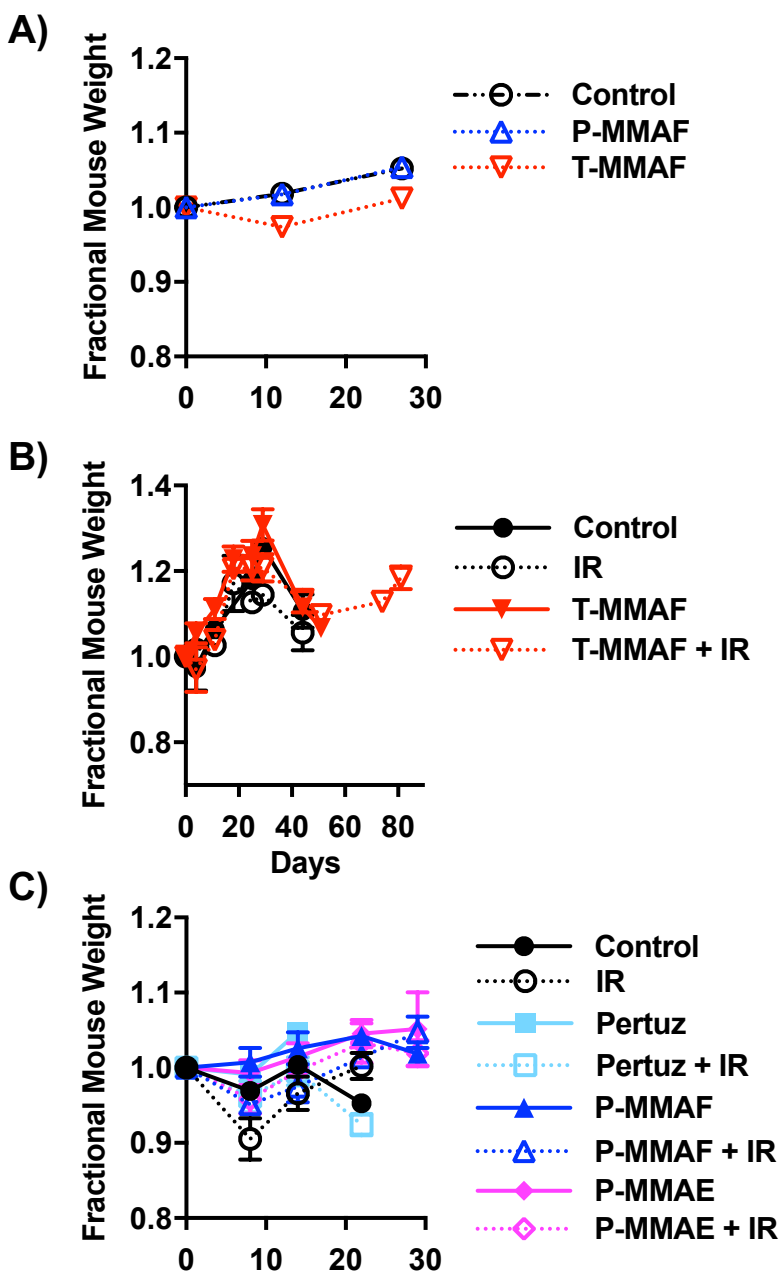

**Supplementary Figure 7: Effect of auristatin antibody drug conjugates in combination with IR on mouse body weight.** Individual mouse body weights were normalized to each mouse's weight on initiation of treatment, Day 0. **A)** Mice from experiment in Fig 5B. **B)** Mice from experiment in Fig 5D. **C)** Mice from experiment in Fig 5G and Supplementary Fig 6. Data is plotted as mean fractional body weight  $\pm$  SEM.
