# Supplementary material
Source: PubMed Central journal article supplement (PMC6946877)
Supplement: NIHMS1541069-supplement-8.pdf [file NIHMS1541069-supplement-8.pdf]

## Supplementary Table 1A

| <u>Tukey's multiple comparisons test</u> | Mean Diff. | 95.00% CI of diff. | Significant? | Summary | Adjusted P Value |
|------------------------------------------|------------|--------------------|--------------|---------|------------------|
| <u>Day 0</u>                             |            |                    |              |         |                  |
| Control vs. P-MMAF                       | -14.5      | -153.9 to 124.9    | No           | ns      | 0.9673           |
| Control vs. T-MMAF                       | -14.4      | -153.8 to 125      | No           | ns      | 0.9677           |
| P-MMAF vs. T-MMAF                        | 0.1        | -139.3 to 139.5    | No           | ns      | >0.9999          |
| <u>Day 4</u>                             |            |                    |              |         |                  |
| Control vs. P-MMAF                       | -6         | -145.4 to 133.4    | No           | ns      | 0.9943           |
| Control vs. T-MMAF                       | -43.5      | -182.9 to 95.86    | No           | ns      | 0.7416           |
| P-MMAF vs. T-MMAF                        | -37.5      | -176.9 to 101.9    | No           | ns      | 0.8007           |
| <u>Day 8</u>                             |            |                    |              |         |                  |
| Control vs. P-MMAF                       | -57.4      | -196.8 to 81.96    | No           | ns      | 0.5948           |
| Control vs. T-MMAF                       | -30.1      | -169.5 to 109.3    | No           | ns      | 0.8665           |
| P-MMAF vs. T-MMAF                        | 27.3       | -112.1 to 166.7    | No           | ns      | 0.8888           |
| <u>Day 12</u>                            |            |                    |              |         |                  |
| Control vs. P-MMAF                       | 83.6       | -55.76 to 223      | No           | ns      | 0.3341           |
| Control vs. T-MMAF                       | 39.9       | -99.46 to 179.3    | No           | ns      | 0.7775           |
| P-MMAF vs. T-MMAF                        | -43.7      | -183.1 to 95.66    | No           | ns      | 0.7396           |
| <u>Day 15</u>                            |            |                    |              |         |                  |
| Control vs. P-MMAF                       | 109.5      | -29.86 to 248.9    | No           | ns      | 0.1545           |
| Control vs. T-MMAF                       | 79.5       | -59.86 to 218.9    | No           | ns      | 0.3707           |
| P-MMAF vs. T-MMAF                        | -30        | -169.4 to 109.4    | No           | ns      | 0.8673           |
| <u>Day 22</u>                            |            |                    |              |         |                  |
| Control vs. P-MMAF                       | 213.4      | 74.04 to 352.8     | Yes          | **      | 0.0011           |
| Control vs. T-MMAF                       | 227.3      | 87.94 to 366.7     | Yes          | ***     | 0.0005           |
| P-MMAF vs. T-MMAF                        | 13.9       | -125.5 to 153.3    | No           | ns      | 0.9699           |
| <u>Day 27</u>                            |            |                    |              |         |                  |
| Control vs. P-MMAF                       | 283.7      | 144.3 to 423.1     | Yes          | ****    | <0.0001          |
| Control vs. T-MMAF                       | 313        | 173.6 to 452.4     | Yes          | ****    | <0.0001          |
| P-MMAF vs. T-MMAF                        | 29.3       | -110.1 to 168.7    | No           | ns      | 0.8730           |

**Supplementary Table 1A: 2 Way ANOVA analysis with Tukey's multiple comparisons testing.** Group comparisons and P value significance testing done with GraphPad Prism. Analysis of experiment shown in Figure 5B. Table is Tukey's Multiple Comparisons. Summary values indicate as follows: ns for  $P > 0.05$ , \*  $P \leq 0.05$ , \*\*  $P \leq 0.01$ , \*\*\*  $P \leq 0.001$ , \*\*\*\*  $P \leq 0.0001$ .

## Supplementary Table 1B (Cont)

### Log-rank (Mantel-Cox) test (recommended)

|                                        |         |
|----------------------------------------|---------|
| Chi square                             | 21.87   |
| df                                     | 3       |
| P value                                | <0.0001 |
| P value summary                        | ****    |
| Are the survival curves sig different? | Yes     |

### Logrank test for trend (recommended)

|                 |         |
|-----------------|---------|
| Chi square      | 16.22   |
| df              | 1       |
| P value         | <0.0001 |
| P value summary | ****    |
| Sig. trend?     | Yes     |

### Gehan-Breslow-Wilcoxon test

|                                        |        |
|----------------------------------------|--------|
| Chi square                             | 20.5   |
| df                                     | 3      |
| P value                                | 0.0001 |
| P value summary                        | ***    |
| Are the survival curves sig different? | Yes    |

**Supplementary Table 1B: Survival curve statistical analysis.** Group comparisons and P value significance testing done with GraphPad Prism. Analysis of experiment shown in Figure 5D. P value summary: ns for  $P > 0.05$ , \*  $P \leq 0.05$ , \*\*  $P \leq 0.01$ , \*\*\*  $P \leq 0.001$ , \*\*\*\*  $P \leq 0.0001$ .

## Supplementary Table 1C

| <u>Tukey's multiple comparisons test</u> | Mean Diff. | 95.00% CI of diff. | Significant? | Summary | Adjusted P Value |
|------------------------------------------|------------|--------------------|--------------|---------|------------------|
| <u>Day 0</u>                             |            |                    |              |         |                  |
| IR vs. P-MMAE                            | 3.5        | -162.3 to 169.3    | No           | ns      | 0.9986           |
| IR vs. P-MMAE + IR                       | 36         | -129.8 to 201.8    | No           | ns      | 0.8645           |
| P-MMAE vs. P-MMAE + IR                   | 32.5       | -133.3 to 198.3    | No           | ns      | 0.8880           |
| <u>Day 4</u>                             |            |                    |              |         |                  |
| IR vs. P-MMAE                            | -20.4      | -186.2 to 145.4    | No           | ns      | 0.9543           |
| IR vs. P-MMAE + IR                       | 54.8       | -111 to 220.6      | No           | ns      | 0.7141           |
| P-MMAE vs. P-MMAE + IR                   | 75.2       | -90.64 to 241      | No           | ns      | 0.5315           |
| <u>Day 8</u>                             |            |                    |              |         |                  |
| IR vs. P-MMAE                            | 89.2       | -76.64 to 255      | No           | ns      | 0.4119           |
| IR vs. P-MMAE + IR                       | 161.7      | -4.143 to 327.5    | No           | ns      | 0.0577           |
| P-MMAE vs. P-MMAE + IR                   | 72.5       | -93.34 to 238.3    | No           | ns      | 0.5555           |
| <u>Day 12</u>                            |            |                    |              |         |                  |
| IR vs. P-MMAE                            | 261        | 95.16 to 426.8     | Yes          | ***     | 0.0008           |
| IR vs. P-MMAE + IR                       | 305.8      | 140 to 471.6       | Yes          | ****    | <0.0001          |
| P-MMAE vs. P-MMAE + IR                   | 44.8       | -121 to 210.6      | No           | ns      | 0.7982           |
| <u>Day 14</u>                            |            |                    |              |         |                  |
| IR vs. P-MMAE                            | 187        | 21.16 to 352.8     | Yes          | *       | 0.0229           |
| IR vs. P-MMAE + IR                       | 307.9      | 142.1 to 473.7     | Yes          | ****    | <0.0001          |
| P-MMAE vs. P-MMAE + IR                   | 120.9      | -44.94 to 286.7    | No           | ns      | 0.1987           |

**Supplementary Table 1C: 2 Way ANOVA analysis with Tukey's multiple comparisons testing.** Group comparisons and P value significance testing done with GraphPad Prism. Analysis of experiment shown in Supplementary Figure 6. Table is Tukey's Multiple Comparisons. Summary values indicate as follows: ns for  $P > 0.05$ , \*  $P \leq 0.05$ , \*\*  $P \leq 0.01$ , \*\*\*  $P \leq 0.001$ , \*\*\*\*  $P \leq 0.0001$ .

## Supplementary Table 1D

| <u>Tukey's multiple comparisons test</u> | Mean Diff. | 95.00% CI of diff. | Significant? | Summary | Adjusted P Value |
|------------------------------------------|------------|--------------------|--------------|---------|------------------|
| <u>Day 0</u>                             |            |                    |              |         |                  |
| IR vs. P-MMAF                            | 26.6       | -138.3 to 191.5    | No           | ns      | 0.9227           |
| IR vs. P-MMAF + IR                       | 49.1       | -115.8 to 214      | No           | ns      | 0.7607           |
| P-MMAF vs. P-MMAF + IR                   | 22.5       | -142.4 to 187.4    | No           | ns      | 0.9440           |
| <u>Day 4</u>                             |            |                    |              |         |                  |
| IR vs. P-MMAF                            | 0.2        | -164.7 to 165.1    | No           | ns      | >0.9999          |
| IR vs. P-MMAF + IR                       | 52.9       | -112 to 217.8      | No           | ns      | 0.7280           |
| P-MMAF vs. P-MMAF + IR                   | 52.7       | -112.2 to 217.6    | No           | ns      | 0.7298           |
| <u>Day 8</u>                             |            |                    |              |         |                  |
| IR vs. P-MMAF                            | 34.9       | -130 to 199.8      | No           | ns      | 0.8707           |
| IR vs. P-MMAF + IR                       | 125.4      | -39.53 to 290.3    | No           | ns      | 0.1728           |
| P-MMAF vs. P-MMAF + IR                   | 90.5       | -74.43 to 255.4    | No           | ns      | 0.3974           |
| <u>Day 12</u>                            |            |                    |              |         |                  |
| IR vs. P-MMAF                            | 101.7      | -63.23 to 266.6    | No           | ns      | 0.3128           |
| IR vs. P-MMAF + IR                       | 267.3      | 102.4 to 432.2     | Yes          | ***     | 0.0005           |
| P-MMAF vs. P-MMAF + IR                   | 165.6      | 0.6714 to 330.5    | Yes          | *       | 0.0488           |
| <u>Day 14</u>                            |            |                    |              |         |                  |
| IR vs. P-MMAF                            | 101.3      | -63.63 to 266.2    | No           | ns      | 0.3157           |
| IR vs. P-MMAF + IR                       | 290.5      | 125.6 to 455.4     | Yes          | ***     | 0.0002           |
| P-MMAF vs. P-MMAF + IR                   | 189.2      | 24.27 to 354.1     | Yes          | *       | 0.0202           |

**Supplementary Table 1D: 2 Way ANOVA analysis with Tukey's multiple comparisons testing.** Group comparisons and P value significance testing done with GraphPad Prism. Analysis of experiment shown in Figure 5G. Table is Tukey's Multiple Comparisons. Summary values indicate as follows: ns for  $P > 0.05$ , \*  $P \leq 0.05$ , \*\*  $P \leq 0.01$ , \*\*\*  $P \leq 0.001$ , \*\*\*\*  $P \leq 0.0001$ .
